# Supplementary material
Source: publisher site journal article supplement (https://www.dovepress.com/article/501409)
Supplement: Supplementary file 1 [file get_supplementary_file.php]

| **Table S1 Importance assessment of the outcomes** | | |
| --- | --- | --- |
| **NO.** | **Outcome** | **Definition** |
| 1 | Effective rate | Effective rate refers to the ratio of patients with chronic low back pain experiencing symptom alleviation after treatment, compared to the total number of individuals receiving the treatment. Assessment can utilize indicators such as success rate, improvement rate, or efficacy index. |
| 2 | TCM patterns changes | TCM patterns changes are assessed by examining the pre- and post-treatment alterations in scores of various TCM syndromes for patients with chronic low back pain. This involves the assessment of syndrome scores and TCM symptom scores. |
| 3 | General signs and symptoms | General signs and symptoms encompassed fatigue, sleep, appetite, and other indicators. The assessment involves evaluating changes in symptoms and signs before and after treatment in patients with chronic low back pain. |
| 4 | Clinical overall impression | Clinical overall impression modification refers to clinicians' comprehensive evaluation of a patient's disease severity before and after treatment, based on symptoms, physical manifestations, laboratory tests, imaging outcomes, and other data. This involves changes in overall perception and improvement. |
| 5 | Surgery-related outcomes | Surgical outcomes encompass various measures related to the effects of surgical interventions, including surgical process outcomes (e.g., mean surgical duration, incision length, puncture time) and postoperative outcomes (e.g., postoperative drainage volume, weight-bearing time, and postoperative analgesic drug dosage). These measures serve to assess the efficacy of surgical treatments. |
| 6 | Recurrence rates | The recurrence rate pertains to the proportion of chronic low back pain patients who suffer a relapse following treatment, relative to the aggregate count of initial patients, inclusive of data on recidivism, recurrence rate, and relapse circumstances. |
| 7 | Disease course | Disease course refers to the entire sequence of a medical condition, encompassing its initiation, progression, and ultimate outcome. Should the duration of this course be abbreviated in patients suffering from chronic low back pain following a specific treatment, it would signify the efficacy of said therapeutic approach. |
| 8 | Attack frequency | Attack frequency refers to the frequency of a certain disease over a period of time, such as the frequency of chronic low back pain. If patients with chronic low back pain are treated with a treatment that reduces the frequency of low back pain, the effectiveness of the treatment is reflected. |
| 9 | Laboratory examination | Laboratory examinations are conducted to determine the content, nature, concentration, quantity, and other characteristics of the material submitted for testing, primarily encompassing inflammatory factors, biochemical indicators, and other outcomes. The evaluation involves assessing changes in the results of various physical and chemical examinations in patients with chronic low back pain before and after treatment. |
| 10 | Spinal nerve function | Spinal nerve function refers to the recovery of spinal cord nerve function, encompassing lumbar nerve recovery speed, nerve electrophysiology, nerve conduction velocity, chronic sciatica, neuropathy, and other outcome indicators. The evaluation involves assessing changes in spinal nerve function before and after treatment in patients with chronic low back pain. |
| 11 | Spinal deformity | Spinal deformity refers to the deviation of the coronal, sagittal, or axial position of the spine from the normal position and the occurrence of abnormal morphology, primarily encompassing lumbar instability, lordosis, kyphosis, scoliosis, and other indicators. The evaluation involves assessing the change in the degree of spinal deformity before and after treatment in patients with chronic low back pain. |
| 12 | Muscle-related outcomes | Muscle-related outcomes refer to a series of changes in muscles caused by chronic low back pain, primarily encompassing the degree of muscle atrophy, lumbar and back muscle endurance, lumbar and abdominal muscle strength, flexibility, and injury degree. The evaluation involves assessing changes in muscle strength before and after treatment in patients with chronic low back pain. |
| 13 | Skeletal-related outcomes | Skeletal-related outcomes refer to a series of changes in the bone, primarily the lumbar spine, caused by chronic low back pain, encompassing osteoporosis, wear and tear, lumbar spine degeneration, and bone spurs. The evaluation involves assessing the changes in the degree of osteoporosis before and after treatment in patients with chronic low back pain. |
| 14 | Intervertebral disc-related outcomes | Intervertebral disc-related outcomes refer to a series of changes in the lumbar intervertebral disc caused by chronic low back pain, encompassing the stress of the intervertebral disc, the degree of intervertebral disc herniation, and other indicators. The evaluation involves assessing the changes in the degree of disc herniation before and after treatment in patients with chronic low back pain. |
| 15 | Pain/discomfort | Pain is an unpleasant and emotionally subjective sensation accompanied by actual or potential tissue damage, primarily including low back pain, leg pain, lower limb discomfort, and other outcomes. The evaluation involves assessing the change in the degree of pain or discomfort before and after treatment in patients with chronic low back pain. |
| 16 | Posture and gait | Posture is the outward appearance of the body, and abnormal posture is closely linked to body health and personal habits. Gait refers to the patient's posture during walking, constituting a complex movement process. Posture and gait primarily pertain to the impact of chronic low back pain on patients' posture and gait, encompassing abnormal posture, gait disorders, and other indicators. |
| 17 | Difficult weight-bearing | Difficult weight-bearing refers to the patient's inability to carry or lift heavy objects due to chronic low back pain. |
| 18 | Opioid withdrawal syndrome | Opioid withdrawal syndrome refers to the development of pharmacological tolerance in individuals abusing opioids during prolonged use. Reduction or interruption of the drug results in two withdrawal symptoms: subjective symptoms like anxiety and irritability, and objective signs such as yawning and hyperhidrosis. The evaluation assesses drug withdrawal in patients with chronic low back pain after treatment with opioid analgesics. |
| 19 | locomotor function | Locomotor function refers to the alterations in the movement, protection, and support functions of the motor system due to chronic low back pain, primarily encompassing lumbar function, lower limb function, physical function, sacroiliac joint function, and other outcome indicators. |
| 20 | Activities of daily living | Activities of daily living (ADL) refer to the impact of chronic low back pain on the ability to bend down, stand, lie down, sit, walk, and maintain a single position for an extended period. |
| 21 | Balanced capacity | Balanced capacity refers to the impact of chronic low back pain on the balance ability of patients. The evaluation assesses changes in balance ability before and after treatment in patients with chronic low back pain. |
| 22 | Lumbar dysfunction | Lumbar dysfunction refers to the abnormal function of the lumbar spine caused by chronic low back pain, primarily encompassing waist-specific functional status, specific disability, and other outcome indicators. The evaluation assesses changes in lumbar function before and after treatment in patients with chronic low back pain. |
| 23 | Self-care ability | Self-care ability refers to the effect of chronic low back pain on eating, dressing, brushing teeth, washing face, turning over, and going to the toilet. |
| 24 | Health behavior management | Health behavior management refers to the impact of chronic low back pain on patients' health behavior and management, including activities like low back muscle training and walking. The evaluation assesses changes in the ability of patients with chronic low back pain to perform lower back exercises before and after treatment. |
| 25 | Sexual life/function | Sexual life/function refers to the inability of patients to have sexual life or a decrease in sexual function due to chronic low back pain." It evaluates changes in sexual function or sexual frequency before and after treatment in patients with chronic low back pain. |
| 26 | Social activity | Social activities refers to the impact of chronic low back pain on leisure, entertainment and social activities of patients. |
| 27 | Social and family relationships | Social and family relationships refer to the impact of chronic low back pain on the relationships with friends, colleagues, partners, parents, and children of patients. For example, patients with chronic low back pain were deemed effective if they spent more time with family members and experienced improved social and family relationships after treatment. |
| 28 | Social isolation | Social isolation refers to the self-perceived social isolation of patients with chronic low back pain. |
| 29 | Social Dysfunction | Social disorders were classified into psychosocial disorders, social dysfunction, and social anxiety disorders. When interacting with people (especially in public occasions), they can't help but feel nervous and afraid, so that they are at a loss, incoherent, and even afraid to see people, which is often called social phobia and interpersonal phobia. It evaluates changes in the ability of patients with chronic low back pain to interact socially with others before and after treatment. |
| 30 | Social role | Social disorders are classified into psychosocial disorders, social dysfunction, and social anxiety disorders. When interacting with people, especially in public occasions, individuals may feel nervous and afraid, leading to a sense of being at a loss, incoherent, and even afraid to see people, often referred to as social phobia and interpersonal phobia. The evaluation assesses changes in the ability of patients with chronic low back pain to interact socially with others before and after treatment. |
| 31 | Working status | Working status primarily refers to the impact of chronic low back pain on the working status, work efficiency, and work ability of patients. The evaluation assesses the change in the work status of patients before and after treatment. |
| 32 | Positive/negative emotion | Positive/negative emotion impact primarily refers to the positive emotions, such as the belief in actively coping with the disease and the confidence to engage in daily activities, and the negative emotions, such as restlessness, anxiety, fear of activity, and disappointment experienced by patients with chronic low back pain. The evaluation assesses the change in the positive/negative mood of the patient before and after treatment. |
| 33 | Self-efficacy | Self-efficacy refers to the individual's speculation and judgment regarding their ability to complete a specific behavior. For example, patients with low back pain may believe that they cannot complete housework and physical exercise due to reduced self-efficacy. The evaluation assesses the change in self-efficacy of patients before and after treatment. |
| 34 | Coping capacity | Coping capacity refers to the ability to adjust, adapt, problem-solve, and cope with challenges. For example, patients' coping abilities may improve after receiving guidance from doctors for the prevention and care of chronic low back pain. The evaluation assesses the change in coping ability of patients before and after treatment. |
| 35 | Body-image and appearance | Body-image and appearance refer to the perception of a person's relatively stable personality characteristics, style, bearing, and appearance. The evaluation assesses the changes in the perception of body image and appearance of patients with chronic low back pain before and after treatment. |
| 36 | Life satisfaction | Life satisfaction is a comprehensive cognitive judgment of individual life, mainly a general understanding and evaluation of individual life. It evaluates the change in life satisfaction of patients with chronic low back pain before and after treatment. |
| 37 | Stigmatization | Stigmatization refers to the labeling of a group that attributes fewer human qualities to others, such as doubting the authenticity of others' illnesses or labeling people with low back pain as "liars". Individuals with chronic low back pain have faced stigmatization abroad. The evaluation assesses whether individuals with chronic low back pain experience stigmatization. |
| 38 | Self-esteem | Self-esteem refers to respecting oneself and not yielding to others. For example, a patient's self-esteem may be affected by the need to rely on others because they cannot take care of themselves. The evaluation assesses the change in self-esteem in patients with chronic low back pain before and after treatment. |
| 39 | Self-beliefs | Self-beliefs refer to the spiritual beliefs of patients with chronic low back pain, encompassing their understanding and interpretation of various effects of chronic low back pain at the spiritual level, providing a form of spiritual sustenance. The evaluation assesses changes in psychosocial beliefs in patients with chronic low back pain before and after treatment. |
| 40 | Attention | Attention refers to the ability of a person's mental activity to direct and focus on something. The evaluation assesses changes in concentration in patients with chronic low back pain before and after treatment. |
| 41 | Quality of life | Quality of life (QOL) refers to the state assessment of an individual's physical, psychological, and social functioning, representing overall health quality. The primary outcome indicators include mental health-related quality of life and physical health-related quality of life. The evaluation assesses the change in quality of life in patients with chronic low back pain before and after treatment. |
| 42 | Overall perceived effect | Overall perceived effect refers to the overall understanding and feeling of patients with chronic low back pain after treatment. It evaluates the perception of the effectiveness of treatment in patients with chronic low back pain. |
| 43 | Overall satisfaction | Overall satisfaction refers to patients' satisfaction with the treatment effect and nursing process. |
| 44 | Compliance | Compliance, also known as compliance and compliance, refers to the behavior of patients in accordance with the doctor's instructions for treatment. It mainly included patients' compliance with doctor's advice, patients' withdrawal time and other indicator |
| 45 | Appropriate medical care | Appropriate medical care refers to whether the clinician or the patient believes that the treatment is appropriate |
| 46 | Economic cost | Economic cost refers to the cost incurred by patients with chronic low back pain due to the treatment of chronic low back pain, mainly including cost-effectiveness, economic cost, hospitalization expenses, material life changes and other indicators. |
| 47 | Quality-adjusted life year | Quality-adjusted life year (Qaly) is an adjusted life expectancy used to evaluate and compare health interventions. If diagnosed, a patient is expected to live with the disease for 10 years. Assuming that the patient has the option of being fully healthy but that her time alive will be reduced to 8 years, the next 10 years for the patient will be considered to be 8 quality-adjusted life-years. |
| 48 | Healthcare Utilization | Healthcare utilization is the ratio of healthcare cost to effectiveness, reflecting resource utilization. |
| 49 | Time cost | Time cost refers to the time spent by patients with chronic low back pain during the course of the disease. Outcome measures such as time cost, average treatment days, and treatment duration were included |
| 50 | Re-operation rate | Re-operation rate refers to the ratio of the number of patients with chronic low back pain who need reoperation after surgical treatment to the total number of patients treated, indicating the need for further treatment. |
| 51 | Analgesic consumption | Analgesic consumption mainly refers to the need for further drug treatment in patients with chronic low back pain during surgery or other treatment, such as increasing the dose of analgesics or considering the combination of analgesics |
| 52 | Chronic risk | Chronic risk refers to the gradual and persistent risk of disease. It evaluates the change in the risk of chronicity in patients with chronic low back pain before and after treatment. |
| 53 | Social/care-giver burden | Social/care-giver burden refers to the outcome related to the economic or temporal impact on caregivers or the entire society, such as the need for assistance from others or family members, the placement of patients with chronic low back pain, and the impact on family income. |
| 54 | Therapeutic safety | Therapeutic safety mainly refers to the outcome indicators related to blood, urine, liver, kidney function, electrocardiogram, pulse rate, blood pressure, respiration, intra-abdominal pressure, and bladder function measured in patients with chronic low back pain after treatment |
| 55 | Analgesic side effects | Analgesic side effects refer to the outcome that is not consistent with the purpose of pain relief or unfavorable to the patient after the use of analgesic drugs in patients with chronic low back pain. |
| 56 | Surgery-related adverse events | Surgery-related adverse events refer to a series of symptoms or signs that are not beneficial or expected to patients during the surgical treatment of chronic low back pain. The main outcomes included nerve root adhesion and intraoperative nerve injury. |
| 57 | Adverse event | Adverse events mainly refer to the unpredictable outcome of patients with chronic low back pain after treatment that is not consistent with the purpose of treatment or refers to another disease caused by patients with chronic low back pain during the occurrence and development of the disease. |

| **Table S2 Focus group questions** | |
| --- | --- |
| NO. | Question |
| 1 | The survey results indicated that doctors prioritize effective rate more than patients. what is your opinion on such disparities? |
| 2 | The survey results indicated that doctors prioritize clinical overall impression more than patients . what is your opinion on such disparities? |
| 3 | The survey results indicated that doctors prioritize recurrence rates more than patients . what is your opinion on such disparities? |
| 4 | The survey results indicated that doctors prioritize impact on quality of life more than patients . what is your opinion on such disparities? |
| 5 | The survey results indicated that patients prioritize overall satisfaction more than doctors . what is your opinion on such disparities? |
| 6 | The survey results indicated that patients prioritize healthcare Utilization more than doctors . what is your opinion on such disparities? |
| 7 | The survey results indicated that patients prioritize quality-adjusted life year more than doctors . what is your opinion on such disparities? |
| 8 | The survey results indicated that patients prioritize locomotor function more than doctors . what is your opinion on such disparities? |
| 9 | The survey results indicated that patients prioritize sexual life/function more than doctors . what is your opinion on such disparities? |
| 10 | The survey results indicated that patients prioritize body-image and appearance more than doctors . what is your opinion on such disparities? |
| 11 | The survey results indicated that patients prioritize stigmatization more than doctors . what is your opinion on such disparities? |
| 12 | The survey results indicated that patients prioritize self-esteem more than doctors . what is your opinion on such disparities? |
| 13 | The survey results indicated that patients prioritize posture and gait more than doctors . what is your opinion on such disparities? |
| 14 | The survey results indicated that patients prioritize difficult Weight-bearing more than doctors . what is your opinion on such disparities? |
| 15 | The survey results indicated that patients prioritize skeletal-related issues more than doctors . what is your opinion on such disparities? |
| 16 | The survey results indicated that patients prioritize intervertebral disc problems more than doctors . what is your opinion on such disparities? |
| 17 | The survey results indicated that patients prioritize spinal deformity more than doctors . what is your opinion on such disparities? |
| 18 | The survey results indicated that doctors and patients shared a priority for pain/discomfort. what is your opinion on such result? |
| 19 | The survey results indicated that doctors and patients shared a priority for activities of daily living more than doctors. what is your opinion on such result? |
| 20 | The survey results indicated that patients prioritize adverse event more than doctors . what is your opinion on such disparities? |
| 21 | The survey results indicated that patients prioritize surgery-related adverse events more than doctors . what is your opinion on such disparities? |
| 22 | The survey results indicated that patients prioritize therapeutic safety more than doctors . what is your opinion on such disparities? |
| 23 | The survey results indicated that doctors prioritize analgesic side effects more than patients . what is your opinion on such disparities? |
| 24 | The survey results indicated that doctors prioritize analgesic consumption more than patients . what is your opinion on such disparities? |

| Table S3 Characteristics of patients | | | | | |
| --- | --- | --- | --- | --- | --- |
| Patients | Gender | Age(years) | Diagnosis | Disease course (years) | Focus group |
| P1 | female | 54 | non-specific LBP | 6 | N |
| P2 | female | 61 | lumbar disc herniation | 8 | N |
| P3 | male | 40 | non-specific LBP | 2 | Y |
| P4 | female | 20 | non-specific LBP | 0.25 | N |
| P5 | male | 36 | non-specific LBP | 2 | N |
| P6 | male | 51 | sciatica | 10 | N |
| P7 | female | 45 | lumbar disc herniation | 5 | Y |
| P8 | male | 47 | non-specific LBP | 4 | Y |
| P9 | female | 55 | lumbar disc herniation | 3 | N |
| P10 | female | 37 | non-specific LBP | 1 | Y |
| P11 | female | 62 | spinal stenosis | 10 | N |
| P12 | female | 72 | spinal stenosis | 40 | N |
| P13 | male | 54 | non-specific LBP | 7 | N |
| P14 | female | 40 | sciatica | 0.5 | N |
| P15 | female | 45 | lumbar disc herniation | 1 | Y |
| P16 | male | 34 | non-specific LBP | 3 | N |
| P17 | female | 29 | non-specific LBP | 0.5 | N |
| P18 | male | 30 | non-specific LBP | 1 | N |
| P19 | female | 45 | lumbar spondylolisthesis | 2 | N |
| P20 | female | 67 | lumbar disc herniation | 20 | N |
| P21 | female | 53 | spinal stenosis | 8 | N |
| P22 | female | 46 | non-specific LBP | 2 | N |
| P23 | female | 50 | lumbar spondylolisthesis | 2 | N |
| P24 | male | 36 | sciatica | 4 | Y |
| P25 | female | 35 | non-specific LBP | 1 | N |
| P26 | female | 42 | lumbar spondylolisthesis, | 2 | N |
| P27 | female | 51 | lumbar disc herniation | 3 | Y |
| P28 | female | 33 | lumbar disc herniation | 0.5 | Y |
| P29 | female | 42 | sciatica | 2 | N |
| P30 | male | 38 | lumbar disc herniation | 2 | N |

| Table S4 Characteristics of doctors | | | | | |
| --- | --- | --- | --- | --- | --- |
| Doctors | Gender | Age(years) | medical major | work experience (years) | Focus group |
| D1 | female | 32 | acupuncture | 4 | Y |
| D2 | male | 46 | massage therapy | 17 | N |
| D3 | male | 36 | massage therapy | 7 | N |
| D4 | male | 40 | massage therapy | 13 | N |
| D5 | female | 52 | acupuncture | 32 | N |
| D6 | male | 35 | massage therapy | 7 | Y |
| D7 | male | 43 | orthopedics | 19 | Y |
| D8 | male | 42 | rehabilitation medicine | 18 | N |
| D9 | female | 38 | acupuncture | 9 | N |
| D10 | male | 37 | massage therapy | 19 | N |
| D11 | male | 51 | orthopedics | 25 | Y |
| D12 | male | 30 | acupuncture | 2 | N |
| D13 | male | 44 | anesthesia | 18 | N |
| D14 | female | 35 | massage therapy | 8 | N |
| D15 | male | 38 | massage therapy | 12 | Y |
| D16 | male | 46 | orthopedics | 20 | N |
| D17 | male | 59 | massage therapy | 37 | N |
| D18 | male | 47 | orthopedics | 28 | Y |
| D19 | male | 36 | orthopedics | 17 | N |
| D20 | male | 40 | anesthesia | 12 | N |
| D21 | male | 39 | rehabilitation medicine | 13 | Y |
| D22 | male | 51 | acupuncture | 26 | N |
| D23 | male | 46 | anesthesia | 21 | N |
| D24 | male | 38 | massage therapy | 10 | Y |
| D25 | male | 43 | rehabilitation medicine | 16 | N |
| D26 | male | 41 | massage therapy | 15 | N |
